# Supplementary material
Source: publisher figshare collection journal article supplement (https://gsapubs.figshare.com/ndownloader/files/39478039)
Supplement: Supplementary file 1 [file 39478039]

## Sheet: Sheet3
TABLE S7 WHOLE SR-ND ISOTOPIC COMPOSITIONS OF THE GRANITOIDS FROM THE NORTHERN YILI BLOCK
Sample	Rock name	Age	Rb(ppm)	Sr(ppm)	87Rb/86Sr	87Sr/86Sr	(2σ)	Sm(ppm)	Nd(ppm)	147Sm/144Nd	143Nd/144Nd	(2σ)	INd(t)	Isr(t)	εNd(t)	TDM(Ma)	T2DM(Ma)	fSm/Nd
C15YN08	Granodiorite	352.7	88.2	356	0.717392	0.711524	2.8e-06	2.78	14.2	0.119154	0.512334	2.57e-06	0.512059	0.707924	-2.43904	1316.64	1415.02	-0.394233
C15YN10	Granodiorite	352.7	87.2	406	0.621911	0.711524	3.3e-06	2.87	15.5	0.112695	0.512343	3.47e-06	0.512082	0.708403	-1.982	1219.82	1379.13	-0.427073
C15YN21	Granodiorite	352.4	111	336	0.956581	0.712238	3.1e-06	3.15	15.6	0.122896	0.512336	5.09e-06	0.512053	0.707439	-2.56566	1367.09	1424.89	-0.375209
C15YN23	Granodiorite	352.4	94.8	463	0.592878	0.710791	3.8e-06	3.36	16.4	0.124695	0.512347	1.84e-06	0.51206	0.707817	-2.42996	1375.72	1414.23	-0.366065
C15YN27	Granodiorite	352.4	93.7	440	0.61663	0.710832	2.5e-06	2.9	15	0.117668	0.512331	2.11e-06	0.512064	0.70779	-2.36416	1301.85	1415.15	-0.401787
C15YN29	Granodiorite	352.4	88.3	392	0.652248	0.710851	2.6e-06	3.13	15.5	0.122904	0.512364	1.85e-06	0.512085	0.707632	-1.94207	1320.7	1382	-0.37517
C15YN14	Dioritic microgranular enclave	351.7	86.5	369	0.678778	0.710839	3.2e-06	5.79	27.1	0.130036	0.512405	2.98e-06	0.512093	0.707292	-1.8396	1357.86	1345.79	-0.338913
C15YN16	Dioritic microgranular enclave	351.7	102	259	1.14035	0.713008	2.6e-06	5.71	27.9	0.124562	0.512409	2.53e-06	0.51211	0.707049	-1.5164	1268.84	1320.39	-0.366742
N15JH20	Granitic porphyry	315.2	91.2	694	0.380516	0.70591	7.71e-06	3.01	15.2	0.120525	0.512626	4.78e-06	0.512377	0.704204	2.83251	859.341	970.687	-0.387266
N15JH23	Granitic porphyry	315.2	107	475	0.652271	0.707545	3.66e-06	2.8	14.9	0.114373	0.512624	6.45e-06	0.512389	0.704621	3.04892	808.609	953.639	-0.418539
N15JH27	Granitic porphyry	315.7	139.5	660	0.612024	0.708384	3.06e-06	2.87	15.7	0.111259	0.512613	4.61e-06	0.512384	0.70564	2.9537	800.854	961.14	-0.434372
N15JH29	Granitic porphyry	315.7	96.4	524	0.532701	0.707362	3.22e-06	2.96	16.6	0.108527	0.512617	2.97e-06	0.512394	0.704974	3.14765	773.83	945.861	-0.448262
1) TDM=(1/λ)ln{1+[(143Nd/144Nd)DM−(143Nd/144Nd)S−((147Sm/144Nd)DM- (147Sm/144Nd)S]}, 2) T2DM=(1/λ)ln{1+[(143Nd/144Nd)S−(143Nd/144Nd)DM−((147Sm/144Nd)S- (147Sm/144Nd)C (eλt−1)]/[(147Sm/144Nd)C−(147Sm/144Nd)DM]}, 3) λ=6.54×10−6, (147Sm/144Nd)c=0.118, (147Sm/144Nd)DM=0.21357, (143Nd/ 144Nd)DM=0.513151, (147Sm/144Nd)CHUR=0.1967.
